# Supplementary material
Source: PubMed Central journal article supplement (PMC3134781)
Supplement: 97320630006315S1.pdf [file 97320630006315S1.pdf]

## Supplementary material:

**Table 1:** Target protein and template protein considered for the study

| Target protein               | Uniprot ID | Length  | Template protein                                                                                | PDB ID | e-value |
|------------------------------|------------|---------|-------------------------------------------------------------------------------------------------|--------|---------|
| Polyphenol oxidase           | A8D6D7     | 139 AA. | Catechol oxidase from <i>Ipomoea batatas</i> (Sweet Potatoes)                                   | 1BT1   | 4e-42   |
| Lipoxygenase                 | A8D7D8     | 156 AA. | Crystal structure of delta 413-417:gs I805w Lox                                                 | 3FG3   | 0.004   |
| Eugenol o-methyltransferase  | B2ZA12     | 200 AA. | Crystal structure of isoflavone o-methyltransferase homolog                                     | 2QYO   | 1e-35   |
| Eugenol o-methyltransferase  | B2ZA16     | 200 AA. | Crystal structure of Bchu involved in bacteriochlorophyll C biosynthesis                        | 1X19   | 0.23    |
| Eugenol o-methyltransferase  | B2ZA17     | 154 AA. | Crystal structure analysis of isoflavone o-methyltransferase                                    | 1FP2   | 3e-23   |
| Phenylalanine ammonia-lyase  | B6VQV5     | 145 AA. | Phenylalanine ammonia-lyase (Pal) from <i>Petroselinum crispum</i>                              | 1W27   | 2e-62   |
| Chavicol o-methyltransferase | B6VQV6     | 257 AA  | Crystal structure of isoflavanone 4'-o-methyltransferase complexed with (+)-6a-hydroxymaackiain | 1ZGA   | 1e-56   |
| Chavicol o-methyltransferase | D3KYA1     | 356 AA. | Crystal structure of a putative o-methyltransferase                                             | 2R3S   | 0.005   |

**Table 2:** Amino acid composition (%) of *Ocimum* proteins

| Proteins         | A8D6D7 | A8D7D8 | B2ZA12 | B2ZA16 | B2ZA17 | B6VQV5 | B6VQV6 | D3KYA1 |
|------------------|--------|--------|--------|--------|--------|--------|--------|--------|
| Amino acids      |        |        |        |        |        |        |        |        |
| Alanine(A)       | 5      | 7.1    | 8.5    | 8.5    | 9.7    | 11.7   | 7.8    | 7.6    |
| Cysteine(C)      | 0      | 1.3    | 2.0    | 2.0    | 1.3    | 0.7    | 2.3    | 2.0    |
| Aspartic acid(D) | 6.5    | 5.8    | 3.5    | 3.5    | 3.9    | 2.1    | 7.8    | 6.5    |
| Glutamic acid(E) | 2.2    | 6.4    | 5.0    | 5.0    | 6.5    | 6.9    | 5.4    | 5.3    |
| Phenylalanine(F) | 6.5    | 1.3    | 4.0    | 4.0    | 5.2    | 4.1    | 4.3    | 4.5    |
| Glycine(G)       | 7.2    | 6.4    | 5.5    | 5.5    | 5.8    | 9.7    | 7.4    | 5.6    |
| Histidine(H)     | 2.9    | 5.8    | 7.0    | 7.0    | 7.1    | 2.8    | 3.5    | 3.9    |
| Isoleucine(I)    | 3.6    | 7.7    | 5.0    | 5.0    | 3.2    | 7.6    | 5.8    | 6.2    |
| Lysine(K)        | 2.9    | 7.1    | 5.5    | 5.5    | 4.5    | 4.1    | 6.2    | 5.9    |
| Leucine(L)       | 5.8    | 11.5   | 10.5   | 10     | 9.1    | 15.2   | 8.6    | 10.1   |
| Methionine(M)    | 3.6    | 1.9    | 5.5    | 5.5    | 5.2    | 1.4    | 4.3    | 4.5    |
| Asparagine(N)    | 7.2    | 5.1    | 4.5    | 4.5    | 4.5    | 4.8    | 3.9    | 4.8    |
| Proline(P)       | 10.8   | 5.1    | 5.0    | 5.0    | 4.5    | 6.2    | 3.9    | 3.9    |
| Glutamine(Q)     | 4.3    | 3.8    | 3.0    | 3.0    | 1.9    | 2.8    | 1.9    | 3.9    |
| Arginine(R)      | 5.8    | 4.5    | 4.0    | 4.0    | 3.9    | 1.4    | 2.7    | 2.5    |
| Serine(S)        | 7.2    | 5.1    | 7.0    | 7.0    | 5.8    | 5.5    | 4.7    | 6.2    |
| Threonine(T)     | 7.2    | 7.1    | 5.0    | 5.0    | 5.8    | 6.2    | 5.8    | 5.1    |
| Valine(V)        | 4.3    | 3.2    | 6.0    | 6.5    | 7.1    | 6.2    | 8.9    | 7.3    |
| Tryptophan(W)    | 2.2    | 1.3    | 2.0    | 2.0    | 2.6    | 0      | 2.3    | 2.0    |
| Tyrosine(Y)      | 5.0    | 2.6    | 1.5    | 1.5    | 1.9    | 0.7    | 2.3    | 2.2    |

**Table 3:** Hydrophilic and hydrophobic residues content

| Accession Number | Hydrophobic residues (%) | Hydrophilic residues (%) | Net hydrophobic residues content |
|------------------|--------------------------|--------------------------|----------------------------------|
| A8D6D7           | 48.9                     | 30.9                     | High                             |
| A8D7D8           | 45.5                     | 25                       | High                             |
| B2ZA12           | 52                       | 23                       | High                             |
| B2ZA16           | 52                       | 23                       | High                             |
| B2ZA17           | 52.6                     | 21.4                     | Very high                        |
| B6VQV5           | 62.1                     | 20.7                     | Very high                        |
| B6VQV6           | 53.3                     | 21                       | Very high                        |
| D3KYA1           | 51.7                     | 24.2                     | Very High                        |

**Table 4:** Physicochemical characters as predicted by ExPASy's prot-param program

| Uniprot ID | Protein                      | Sequence length | M.wt.   | pI   | -R | +R | Extinction Coefficient | Instability Index | Aliphatic Index | GRAVY  |
|------------|------------------------------|-----------------|---------|------|----|----|------------------------|-------------------|-----------------|--------|
| A8D6D7     | Polyphenol oxidase           | 139             | 15815.6 | 7.45 | 12 | 12 | 26930                  | 34.50             | 54.03           | -0.660 |
| A8D7D8     | Lipoxygenase                 | 156             | 17511.9 | 6.82 | 19 | 18 | 17085-16960            | 57.08             | 91.35           | -0.494 |
| B2ZA12     | Eugenol o-methyltransferase  | 200             | 22492.1 | 8.38 | 17 | 19 | 26720-26470            | 48.32             | 86.35           | -0.114 |
| B2ZA16     | Eugenol o-methyltransferase  | 200             | 22478.1 | 8.38 | 17 | 19 | 26720-26470            | 46.93             | 85.85           | -0.112 |
| B2ZA17     | Eugenol o-methyltransferase  | 154             | 17386.9 | 6.39 | 16 | 13 | 26595-26470            | 48.62             | 78.57           | -0.161 |
| B6VQV5     | Phenylalanine ammonia-lyase  | 145             | 15121.5 | 5.28 | 13 | 8  | 1490-1490              | 30.71             | 118.48          | 0.423  |
| B6VQV6     | Chavicol o-methyltransferase | 257             | 28569.8 | 5.22 | 34 | 23 | 42315-41940            | 30.88             | 89.88           | -0.003 |

|        |                              |     |       |   |    |    |             |       |       |        |
|--------|------------------------------|-----|-------|---|----|----|-------------|-------|-------|--------|
| D3KYA1 | Chavicol o-methyltransferase | 356 | 39950 | 5 | 42 | 30 | 50795-50420 | 38.34 | 92.30 | -0.038 |
|--------|------------------------------|-----|-------|---|----|----|-------------|-------|-------|--------|

**Table 5:** Presence of disulphide (ss) bond as predicted by Cys\_Rec

| Accession number | CYS_REC          | Score |
|------------------|------------------|-------|
| A8D6D7           | No cystein found | -     |
| A8D7D8           | Cys_114          | -6.8  |
|                  | Cys_124          | -18.4 |
| B2ZA12           | Cys_5            | -7.9  |
|                  | Cys_12           | -17.4 |
|                  | Cys_129          | -31.4 |
|                  | Cys_151          | -31.4 |
| B2ZA16           | Cys_5            | -7.9  |
|                  | Cys_12           | -17.4 |
|                  | Cys_129          | -28.6 |
|                  | Cys_151          | -34.8 |
| B2ZA17           | Cys_83           | -25.8 |
|                  | Cys_105          | -33.0 |
| B6VQV5           | Cys_17           | -24.7 |
| B6VQV6           | Cys_6            | -29.3 |
|                  | Cys_62           | -24.1 |
|                  | Cys_84           | -26.7 |
|                  | Cys_130          | -36.6 |
|                  | Cys_186          | -36.7 |
|                  | Cys_225          | -27.0 |
| D3KYA1           | Cys_37           | -25.0 |
|                  | Cys_97           | -16.8 |
|                  | Cys_153          | -26.7 |
|                  | Cys_175          | -25.6 |
|                  | Cys_221          | -42.8 |
|                  | Cys_277          | -29.2 |
|                  | Cys_316          | -35.5 |

**Table 6:** Calculated secondary structure elements by Profunc

| Secondary Structure      | B2ZA12 | B2ZA17 | B6VQV6 | D3KYA1 | B2ZA16 | A8D7D8 | A8D6D7 | B6VQV5 |
|--------------------------|--------|--------|--------|--------|--------|--------|--------|--------|
| Strand                   | 5.0%   | 2.6%   | 11.7%  | 13.8%  | 6.5    | 12.2%  | 0.0%   | 5.5%   |
| Alpha helix              | 58.5%  | 48.1%  | 46.7%  | 45.2%  | 43.5%  | 18.6%  | 38.1%  | 53.8%  |
| 3-10 helix               | 1.5%   | 1.9%   | 2.3%   | 1.4%   | 1.0%   | 5.1%   | 2.2%   | 2.8%   |
| Other                    | 35.0%  | 47.4%  | 39.3%  | 39.6%  | 49.0%  | 64.1%  | 59.7%  | 37.9%  |
| Total residues           | 200    | 154    | 257    | 356    | 200    | 156    | 139    | 145    |
| Beta sheets              | 1      | 1      | 2      | 2      | 1      | 1      | -      | 1      |
| Beta alpha beta motifs   | -      | -      | 4      | 3      | 2      | -      | -      | -      |
| Strands                  | 3      | 2      | 7      | 9      | 3      | 4      | -      | 3      |
| Helices                  | 15     | 11     | 15     | 19     | 11     | 6      | 7      | 7      |
| Helix-helix interactions | 25     | 13     | 20     | 23     | 8      | 1      | 6      | 8      |
| Beta turns               | 8      | 14     | 14     | 25     | 16     | 16     | 14     | 8      |
| Gamma turns              | 3      | 3      | 1      | 3      | 3      | 5      | 3      | -      |
| Beta hairpins            | 1      | 1      | -      | 2      | -      | 3      | -      | 2      |
| Beta bulges              | -      | -      | -      | 2      | -      | 1      | -      | 1      |

**Table 7:** Protein submitted in PMDB

| Uniprot ID | Protein name                 | PMID      |
|------------|------------------------------|-----------|
| B6VQV6     | chavicol o-methyltransferase | PM0077211 |
| D3KYA1     | chavicol o-methyltransferase | PM0077212 |
| A8D6D7     | Polyphenol oxidase           | PM0077059 |
| A8D7D8     | Lipoxygenase                 | PM0077191 |
| B2ZA16     | Eugenol o-methyltransferase  | PM0077192 |
| B2ZA17     | Eugenol o-methyltransferase  | PM0077201 |
| B6VQV5     | Phenylalanine ammonia-lyase  | PM0077206 |
